# Supplementary material for: Soft-trilinear constraints for improved quantitation in multivariate curve resolution
Source: Royal Society of Chemistry journal article supplement (doi:10.1039/c8an00615f), 2019-11-11
Supplement: c8an00615f1.pdf [file c8an00615f1.pdf]

## Supplemental Material Soft-trilinear constraints for improved quantitation in Multivariate Curve Resolution

Elnaz Tavakkoli <sup>a,b</sup>, Hamid Abdollahi <sup>b</sup>, Paul J. Gemperline <sup>a,\*</sup>

For the *i*th component:

- a. Fold the current estimate of the concentration profile of component *i* into a matrix
2. Apply PCA to the matrix
3. Calculate the value of *k* according to equation 4.
4. if  $k \leq \alpha$ , then

$$\delta_{\alpha=0}$$

else

$$\mathbf{r} = \mathbf{c}_i - \mathbf{c}_{i\text{-hat}}$$

5. 
$$\delta_{\alpha} = \sum \sum (r \times r^T)$$
where,  $\mathbf{c}_{i\text{-hat}} = |(\mathbf{u}_c(:, 2:nf) \mathbf{s}_c(2:nf, 2:nf) \mathbf{v}_c^T(:, 2:nf))|$

6. end if

```
%%%% c is the folded concentration matrix
%%%% nf is number of augmented data matrices
% nf=3 as an example
[u,s,v]=svds(c,nf); %%%%%%%%%%c is the concentration matrix of component i.
var=sum(diag(s).^2);
k=(s(2,2)^2+s(3,3)^2)/var)*100;
t=s(2:nf,2:nf)*v(:,2:nf)';
c_hat=abs(u(:,2:nf)*t);
r=cp-c_hat; %%%%% residual
%%%%%%%%%% define alpha
if k<=alpha
    delta_alpha=0;
else
    delta_alpha=sum(sum(r*r'));
end
```
